# Supplementary material for: Toward the Definition of a Bipolar Prodrome: Dimensional Predictors of Bipolar Spectrum Disorders in At-Risk Youths
Source: Atypon-hosted journal article supplement (doi:10.1176/appi.ajp.2015.15040414), 2016-02-19
Supplement: appi.ajp.2015.15040414.ds001.pdf [file appi.ajp.2015.15040414.ds001.pdf]

 


Psychiatry Online
